# Supplementary material for: Analysis of Phenolic Compounds for the Determination of Grafts (in) Compatibility Using In Vitro Callus Cultures of Sato-Zakura Cherries
Source: MDPI journal article supplement (doi:10.3390/plants10122822), 2021-12-20
Supplement: s1 [file s1]

**Table S1.** The molecular ions and obtained fragments with specified collision energies.

| <b>Compounds</b>              | <b>Parent Ion, <math>m/z</math></b> | <b>Product Ion, <math>m/z</math> (Collision Energy, eV)</b> |
|-------------------------------|-------------------------------------|-------------------------------------------------------------|
| <b>Catechin</b>               | 289.084                             | 203.00 (23); 245.03 (31)                                    |
| <b>Aesculin</b>               | 339.080                             | 133.09 (44); 177.06 (25)                                    |
| <b>Quercetin</b>              | 301.026                             | 151.01 (22); 179.00 (20)                                    |
| <b>Rutin</b>                  | 609.197                             | 299.98 (42); 301.20 (32)                                    |
| <b>Hyperoside</b>             | 463.100                             | 271.00 (43); 300.00 (30)                                    |
| <b>Astragalin</b>             | 447.008                             | 255.03 (43); 284.03 (29)                                    |
| <b>Cynaroside</b>             | 447.000                             | 284.04 (40); 285.03 (27)                                    |
| <b>Apigenin</b>               | 431.001                             | 239.11 (53); 268.03 (36)                                    |
| <b>Luteolin</b>               | 285.035                             | 133.05 (30); 150.95 (24)                                    |
| <b>Apigenin</b>               | 269.032                             | 117.07 (43); 225.09 (23)                                    |
| <b>Baicalein</b>              | 268.956                             | 233.07 (29); 241.09 (26)                                    |
| <b>Naringin</b>               | 579.241                             | 151.42 (43); 217.36 (33)                                    |
| <b>Phloretin</b>              | 273.066                             | 123.26 (26); 167.20 (19)                                    |
| <b><i>p</i>-Coumaric acid</b> | 163.031                             | 93.12 (39); 119.09 (16)                                     |
| <b>Caffeic acid</b>           | 179.004                             | 134.00 (13); 135.00 (16)                                    |
| <b>Ferulic acid</b>           | 193.035                             | 134.06 (19); 178.04 (15)                                    |
| <b>Ellagic acid</b>           | 300.998                             | 229.00 (27); 284.00 (33)                                    |
| <b>Sinapic acid</b>           | 223.082                             | 149.21 (36)                                                 |
| <b>Neochlorogenic acid</b>    | 353.103                             | 191.28 (25)                                                 |
